# Supplementary material
Source: HighWire-hosted journal article supplement (https://bmjopen.bmj.com/content/10/2/e032331)
Supplement: inline-supplementary-material-1 [file inline-supplementary-material-1.pdf]

**Supplementary file:****Search strategy (used in Pubmed)**

("laparoendoscopic single site surgery" OR "laparoendoscopic single port surgery" OR "laparoendoscopic single hole surgery" OR "laparoendoscopic single incision surgery" OR "LESS")

AND ("conventional laparoscopic surgery" OR "traditional laparoscopic surgery" OR "CL")

AND ("benign ovarian tumor" OR "benign ovarian cyst" OR "benign ovarian masses" OR "adnexal disease" OR "endometriosis" OR "ovarian chocolate cyst" OR "endometriotic ovary")
